# Supplementary material
Source: PubMed Central journal article supplement (PMC5659660)

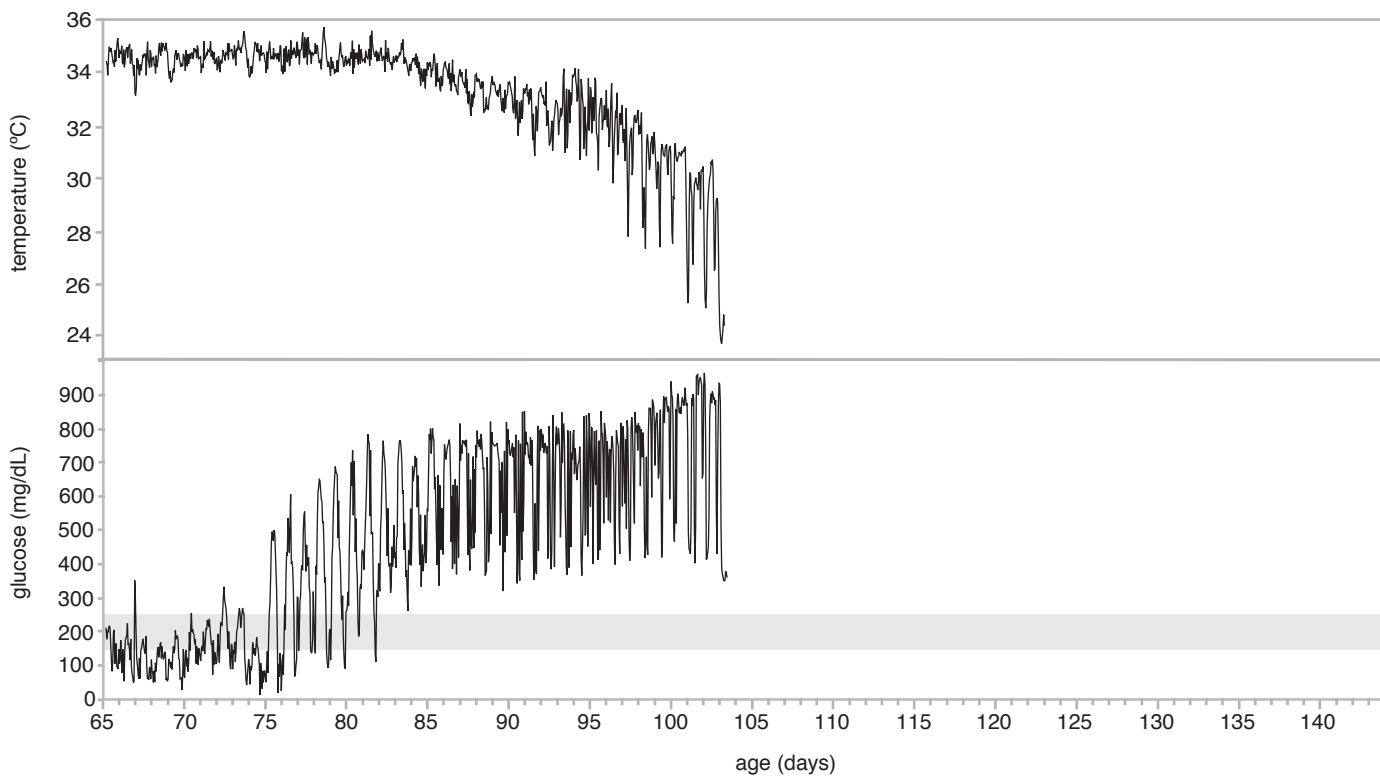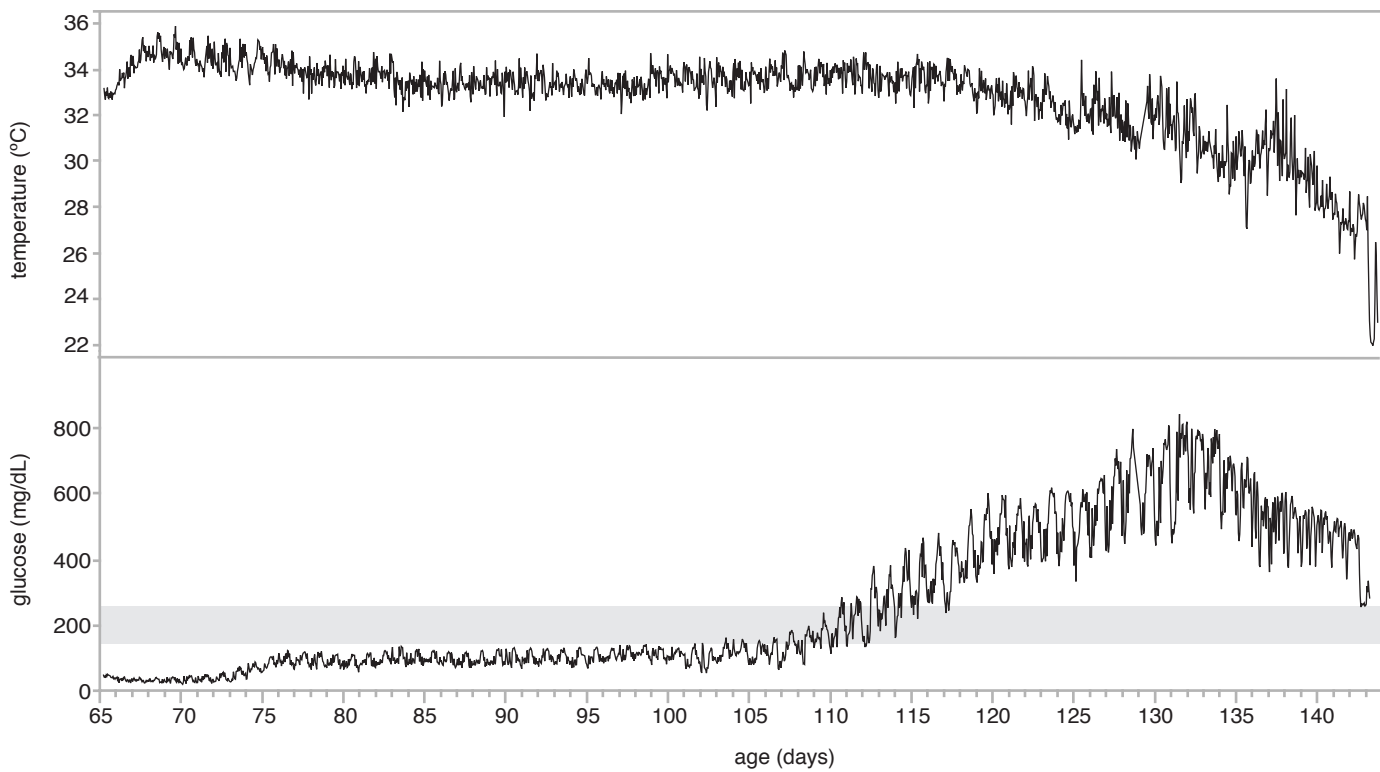

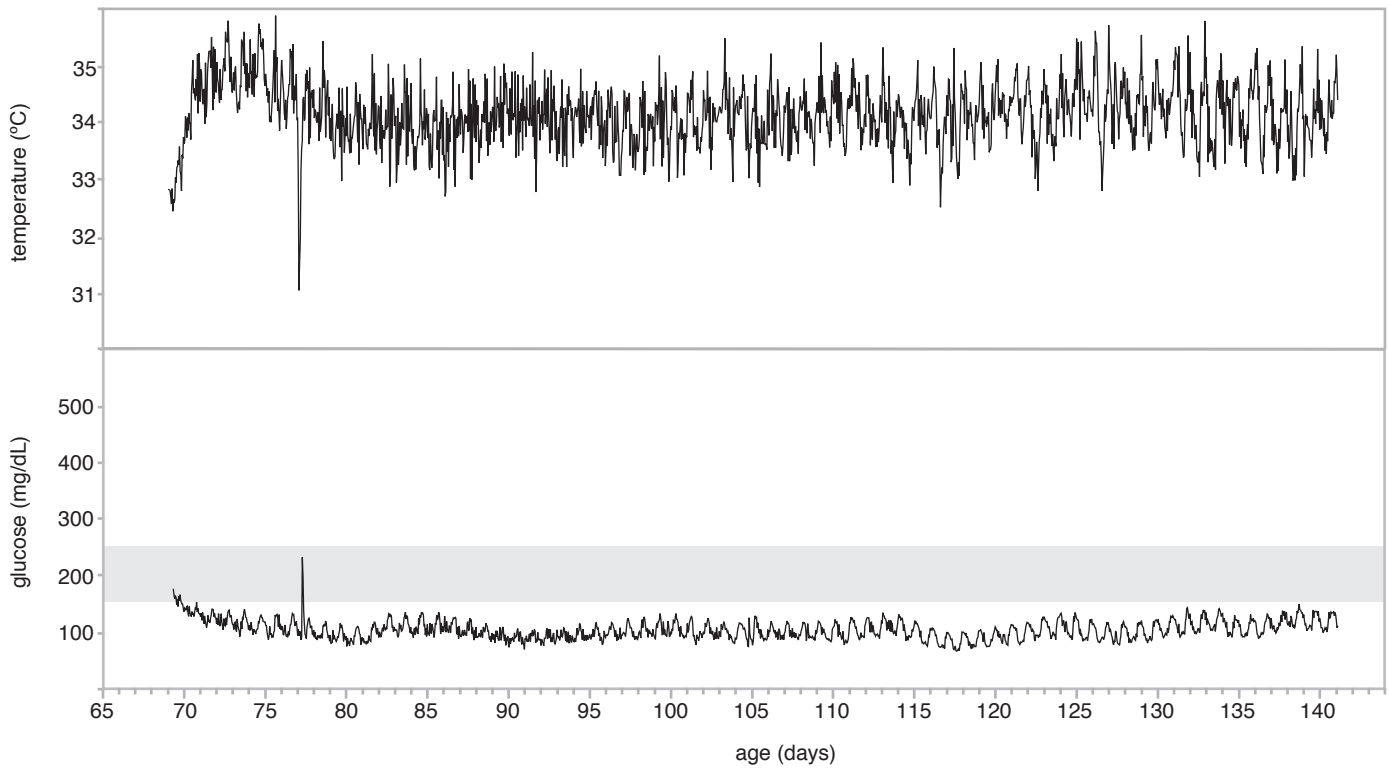

Supplement: en.2017-00266.sf1.pdf [file en.2017-00266.sf1.pdf]

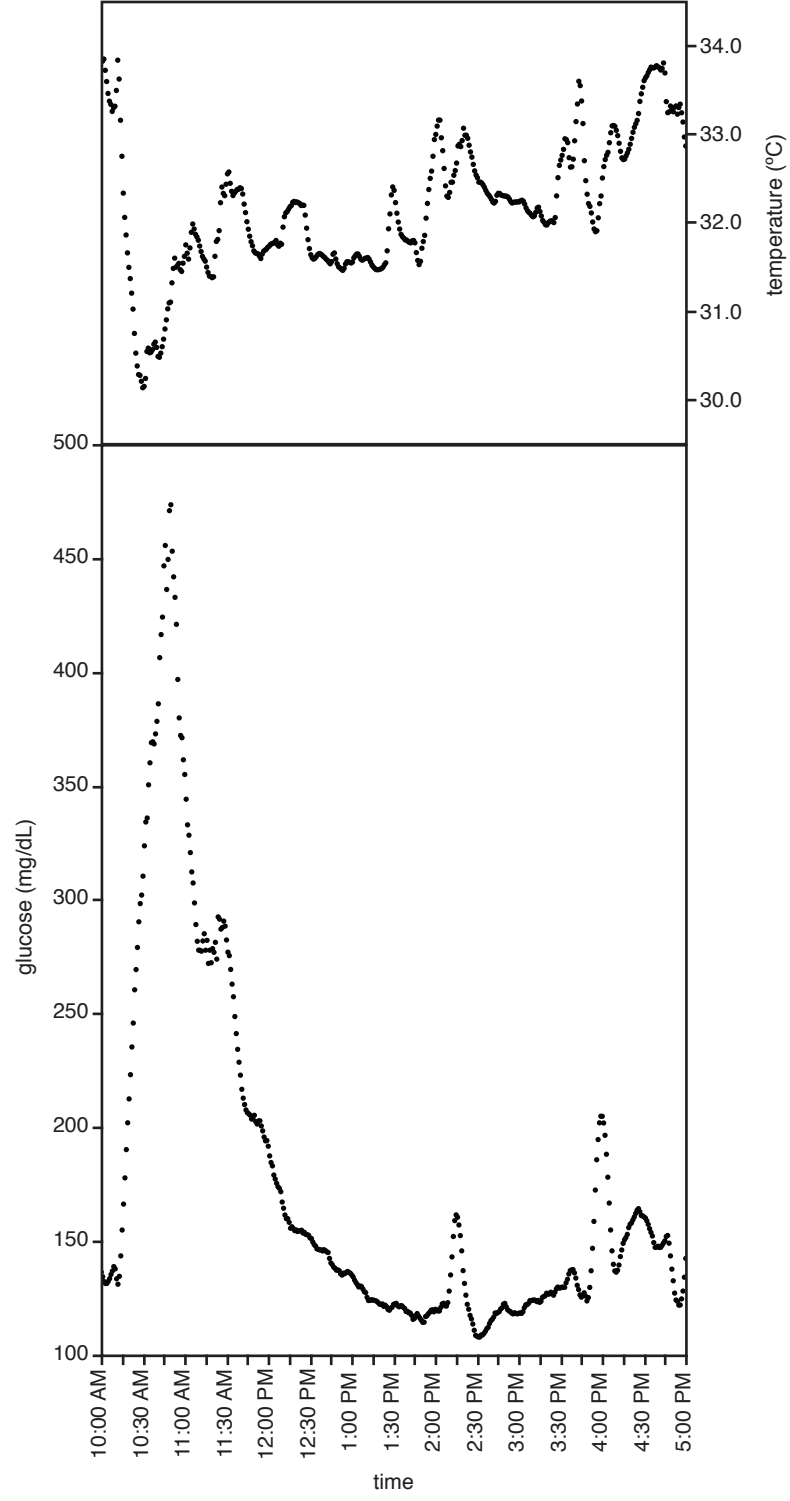

Supplement: en.2017-00266.sf2.pdf [file en.2017-00266.sf2.pdf]
